# Supplementary material
Source: Springer Nature journal article supplement (https://www.springermedizin.de/resource/supplementary/12879_2006_436_MOESM1_ESM.pdf/9448666)

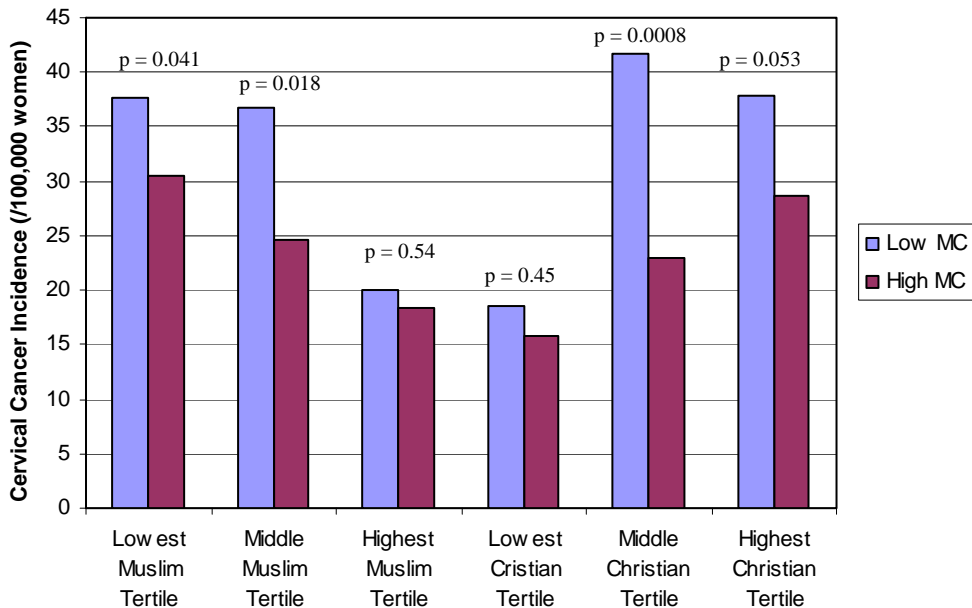

Number of  
Countries:

30 2

14 14

7 36

9 24

7 20

35 8

Supplement: MOESM1 [file 9448666]
